# Supplementary material for: A ratiometric electrochemical strategy for sensitive determination of Furin activity based on dual signal amplification and antifouling nanosurfaces
Source: Royal Society of Chemistry journal article supplement (doi:10.1039/c7an01295k), 2017-01-01
Supplement: c7an01295k1.pdf [file c7an01295k1.pdf]

## ***Supporting Information***

# **Ratiometric Electrochemical strategy for Sensitive Determination of Furin Activity Based on Dual Signal Amplification and Anti-fouling Nanosurface**

Dazhi Yao, Wenqi Zhao, Limin Zhang\* and Yang Tian\*

School of Chemistry and Molecular Engineering, East China Normal University, 500 Dongchuan Road, Shanghai 200241, P.R. China.

\*Corresponding author.

E-mail: [lmzhang@chem.ecnu.edu.cn](mailto:lmzhang@chem.ecnu.edu.cn); [ytian@chem.ecnu.edu.cn](mailto:ytian@chem.ecnu.edu.cn)

Tel: +86-21-54345031; Fax: +86-21-54341041.

1. Ultraviolet-Visible absorption spectrum of GBFs (Figure S1)
2. XPS characterization of modification process of electrodes (Figure S2)
3. HPLC traces of P3 alone, P3 with Furin, or P3 incubated with the inhibitor before addition of Furin for 30 minutes (Figure S3)
4. Stability test (Figure S4)
5. Relationship between peak current density ratio and incubation time (Figure S5)
6. Optimization of concentration ratio of HS-DBA-MB and P3 (Figure S6)
7. Sensitivity comparison between GBF/MB+P3/Fc electrode and Au/MB+P1/Fc electrode (Figure S7).
8. Performance of PEGylated Gold Bellflowers in anti-fouling (Figure S8)
9. Selectivity test (Figure S9)
10. Determination of Furin activity in cell lysates by the present method and by Elisa method (Table S1)

## 1. Ultraviolet-Visible absorption spectrum of GBFs.

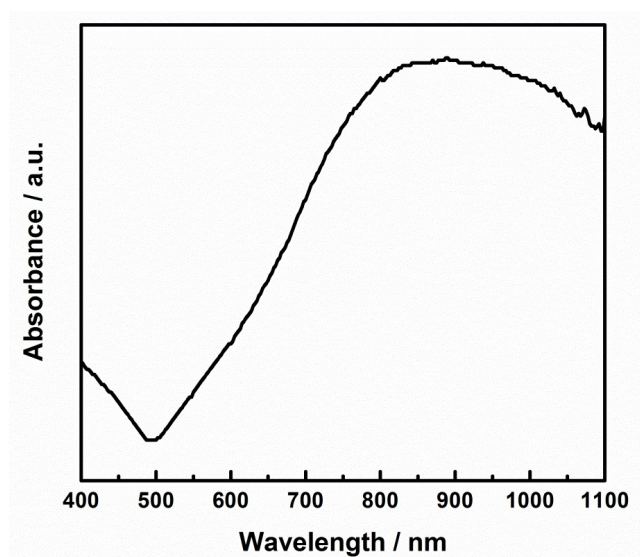

**Figure S1.** Ultraviolet-Visible absorption spectrum of GBFs.

## 2. XPS characterization of modification process of electrodes

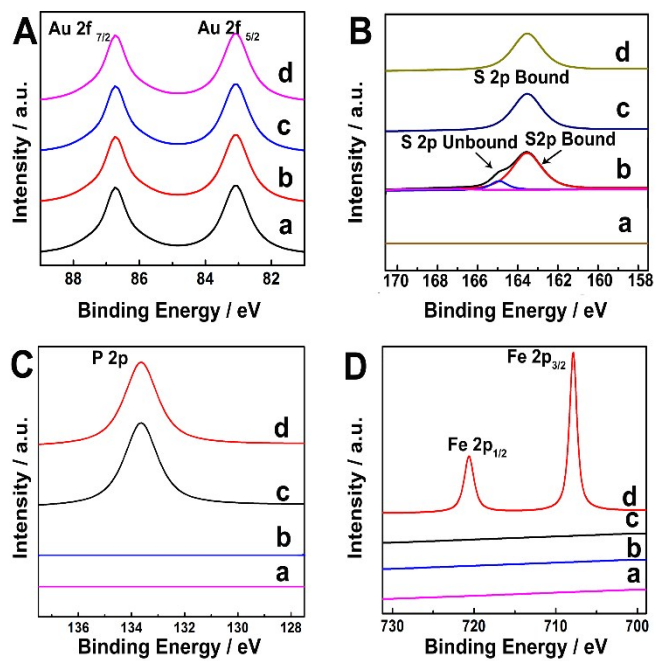

**Figure S2.** XPS spectra of (A) Au 4f<sub>7/2</sub> and Au 4f<sub>5/2</sub>, (B) S 2p, (C) P 2p, (D) Fe 2p<sub>3/2</sub> and Fe 2p<sub>1/2</sub> for (a) Au, (b) Au/GBF, (c) Au/GBF/MB+P3 and (d) GBF/MB+P3/Fc, respectively.

### 3. Stability test.

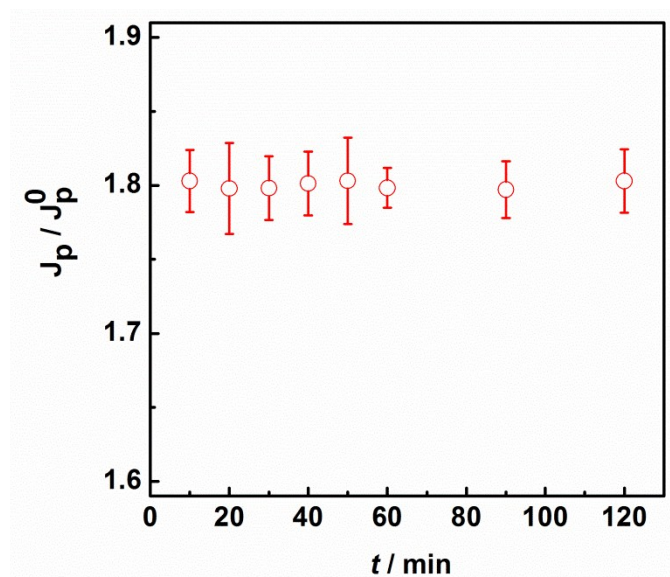

**Figure S3.** Stability test for GBF/MB+P3/Fc in 10 mM PBS (pH 7.4).

**4. HPLC traces of P3 alone, P3 with Furin, or P3 incubated with the inhibitor before addition of Furin for 30 minutes**

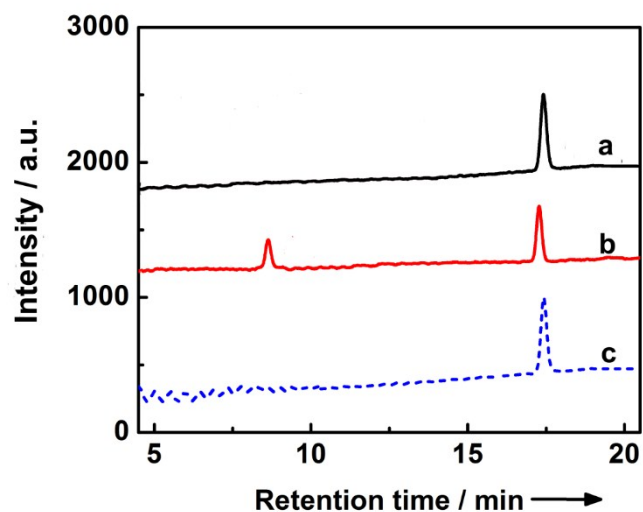

**Figure S4.** HPLC traces of (a) P3 alone, (b) P3 with Furin, or (c) P3 incubated with the inhibitor before addition of Furin for 30 minutes.

## 5. Relationship between peak current density ratio and incubation time.

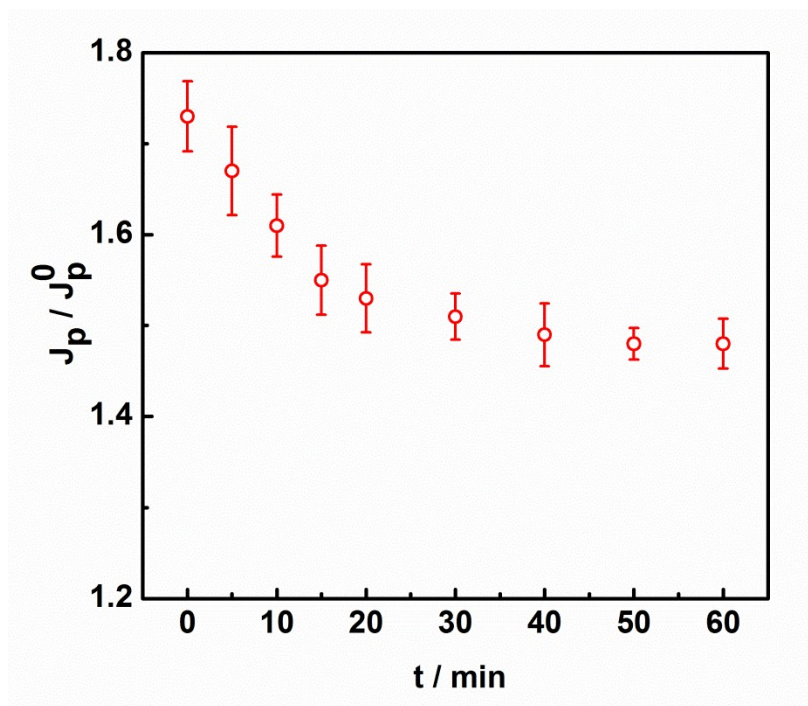

**Figure S5.**  $J_p/J_p^0$  values obtained at GBF/MB+P3/Fc electrode under different time after addition of 5 U/L Furin in 10 mM PBS buffer solution (pH 7.4).

## 6. Optimization of volume ration of SH-DBA-MB and P3 on electrode modification

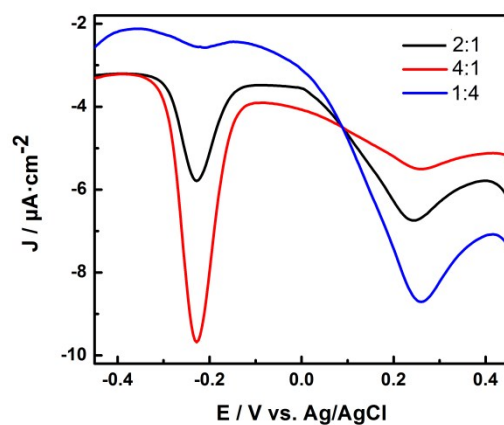

**Fig. S6.** DPV responses obtained at GBF/MB+P3/Fc modified with different  $C_{MB}$  to  $C_{P3}$ .

**7. Sensitivity comparison between GBF/MB+P3/Fc electrode and Au/MB+P1/Fc electrode.**

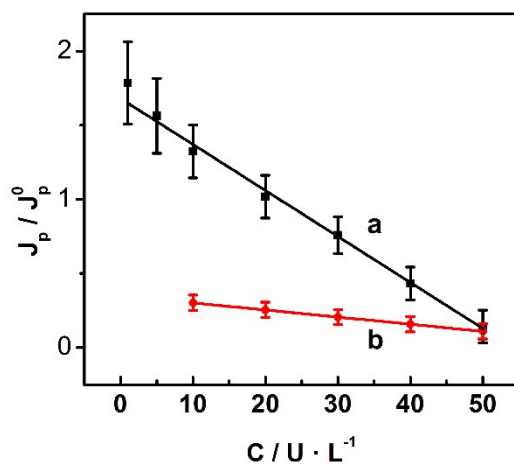

**Figure S6.** The linear plots of  $J_p/J_p^0$  with Furin activity obtained at (a) GBF/MB+P3/Fc and (b) Au/MB+P1/Fc electrodes.



## 8. Performance comparison of PEGlyated Gold Bellflowers (GBFs) to antifouling

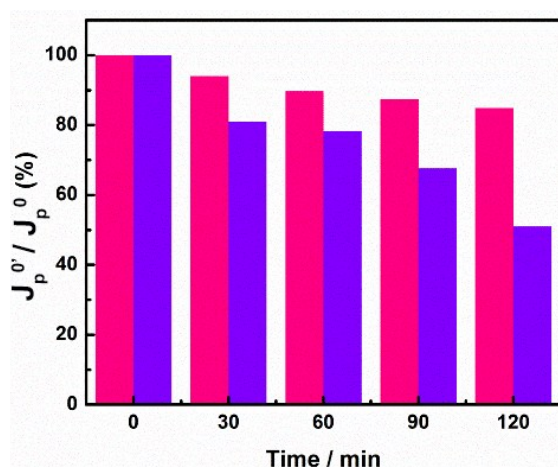

**Fig. R8.**  $J_p^{0'}/J_p^0$  values obtained at GBF/MB+P3/Fc (red column), and Au/MB+P3/Fc without PEGlyated gold bellflowers (blue column), where  $J_p^{0'}$  stands for the current density of MB dipped in cell lysate for different time,  $J_p^0$  is the initial current density of MB.

## 9. Selectivity test

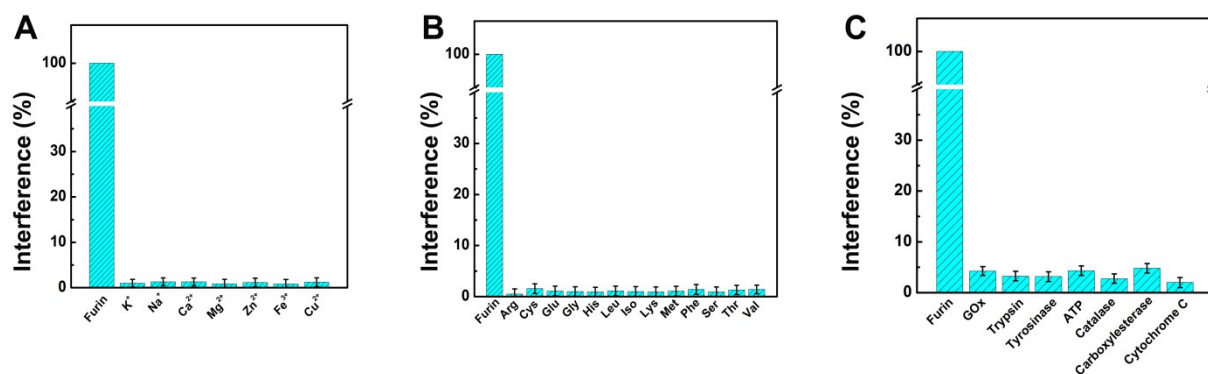

**Figure S9.** Selectivity test: Interference on peak current density ratio obtained at 190 mV and -220 mV in addition of (A) metal ions: (a) 20 U/L Furin, (b) K<sup>+</sup> (150 mM), (c) Na<sup>+</sup> (150 mM), (d) Ca<sup>2+</sup> (2.5 mM), (e) Mg<sup>2+</sup> (2.5 mM), (f) Zn<sup>2+</sup> (1 mM), (g) Fe<sup>3+</sup> (10 μM) and (h) Cu<sup>2+</sup> (10 μM) ; (B) amino acids: (a) 20 U/L Furin, (b) Arg, (c) Cys, (d) Glu, (e) Gly, (f) His, (g) Leu, (h) Iso, (i) Lys, (j) Met, (k) Phe, (l) Ser, (m) Thr, and (n) Val (10 μM for b to n) and (C) Enzyme and biological molecules: (a) Furin (20 U/L), (b) Glucose Oxidase (GOx, 20 U/L), (c) Trypsin (20 U/L), (d) Tyrosinase (20 U/L), (e) Catalase (1 mg/mL), (f) ATP (1 mM), (g) Carboxylesterase (1 mg/mL) and (h) Cytochrome C (10 μM). Herein, the interference % was estimated according to  $(J_p/J_p^0)/(J_p/J_p^0)_I$ , in which  $(J_p/J_p^0)_I$  means the  $J_p/J_p^0$  value after addition of various interferences.

**10. Determination of Furin activity in cell lysates by the present method and by Elisa method.**

**Table S1.** Determination of Furin activity in cell lysates by the present method and by Elisa method.

| Cells      | Number of cell  | Our developed Method (U/ L) | Elisa Method (U/ L) |
|------------|-----------------|-----------------------------|---------------------|
| U251       | 10 <sup>3</sup> | 2.53±0.59                   | N.A.                |
|            | 10 <sup>4</sup> | 27.78±6.38                  | 27.53±4.35          |
| MDA-MB-468 | 10 <sup>3</sup> | 1.89±0.57                   | N.A.                |
|            | 10 <sup>4</sup> | 16.92±4.94                  | 17.04±3.31          |
| Lovo cell  | 10 <sup>3</sup> | N.A.                        | N.A.                |
|            | 10 <sup>4</sup> | N.A.                        | N.A.                |
